# Supplementary material
Source: PubMed Central journal article supplement (PMC5303055)
Supplement: SD12.pdf [file SD12.pdf]

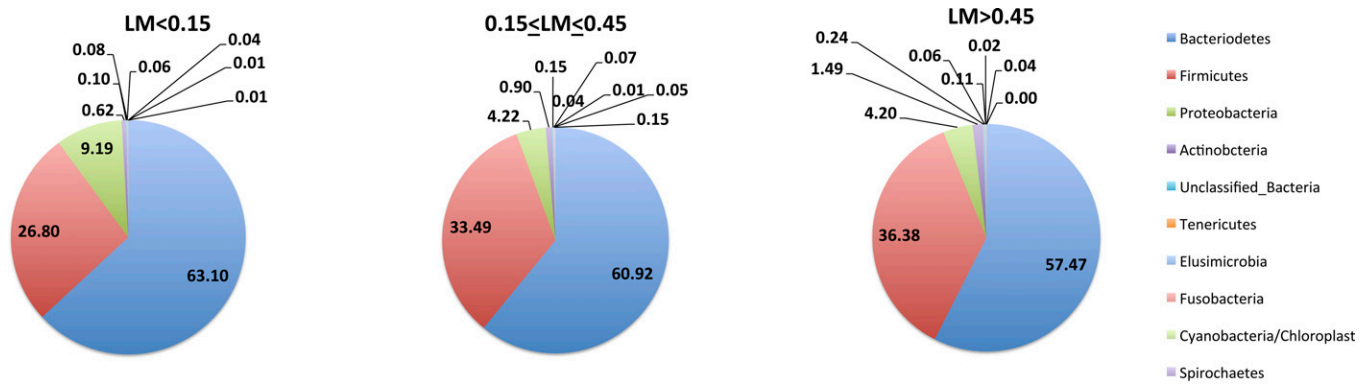

| PHYLA                            | L:M < 0.15<br>n=8 | 0.15 ≤ L:M ≤ 0.45<br>n=49 | L:M > 0.45<br>n=24 | ANOVA  |
|----------------------------------|-------------------|---------------------------|--------------------|--------|
| <b>Bacteroidetes</b>             | 63.10 ± 11.64     | 60.92 ± 14.56             | 57.47 ± 17.27      | 0.558  |
| <b>Firmicutes</b>                | 26.80 ± 8.28      | 33.49 ± 14.33             | 36.38 ± 15.00      | 0.254  |
| <b>Proteobacteria</b>            | 9.19 ± 5.61       | 4.22 ± 5.50               | 4.20 ± 4.59        | 0.045* |
| <b>Actinobacteria</b>            | 0.62 ± 0.73       | 0.90 ± 1.21               | 1.49 ± 1.27        | 0.086  |
| <b>Unclassified_Bacteria</b>     | 0.10 ± 0.14       | 0.15 ± 0.21               | 0.24 ± 0.51        | 0.438  |
| <b>Tenericutes</b>               | 0.08 ± 0.20       | 0.04 ± 0.10               | 0.06 ± 0.16        | 0.659  |
| <b>Elusimicrobia</b>             | 0.06 ± 0.16       | 0.07 ± 0.35               | 0.02 ± 0.07        | 0.774  |
| <b>Fusobacteria</b>              | 0.04 ± 0.05       | 0.01 ± 0.01               | 0.11 ± 0.47        | 0.297  |
| <b>Cyanobacteria/Chloroplast</b> | 0.01 ± 0.01       | 0.05 ± 0.13               | 0.04 ± 0.06        | 0.612  |
| <b>Spirochaetes</b>              | 0.01 ± 0.01       | 0.15 ± 0.61               | 0.00 ± 0.00        | 0.402  |

SUPPLEMENTAL FIGURE 1. 16S RNA bacterial sequences represented in fecal samples from 81 Malawian children. Pie charts of average values of relative abundance (percentage of sequences) of the most abundant bacterial phyla found in the fecal microbiota of children with no environmental enteric dysfunction (EED) (lactulose:mannitol [L:M] < 0.15), moderate EED (0.15 ≤ L:M ≤ 0.45), and severe EED.

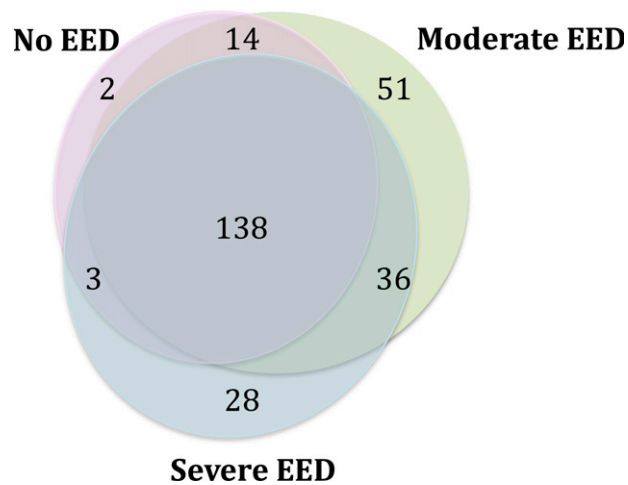

SUPPLEMENTAL FIGURE 2. Venn diagram represents the 272 different genera present in each lactulose:mannitol (L:M) category of the children studied: no environmental enteric dysfunction (EED) (L:M < 0.15), moderate EED (0.15 ≤ L:M ≤ 0.45), and severe EED (L:M > 0.45).

SUPPLEMENTAL TABLE 1  
Associations of bacterial genera with EED classification

| Genera                                    | No EED <sup>1</sup> | Moderate EED <sup>1</sup> | Severe EED <sup>1</sup> | ANOVA test 3 categories no EED, moderate and severe EED | Spearman's correlation coefficient (P value) | Fold-Change (no EED vs. severe EED) | LefSe linear discriminant analyses LDA Score (log 10) >2 |
|-------------------------------------------|---------------------|---------------------------|-------------------------|---------------------------------------------------------|----------------------------------------------|-------------------------------------|----------------------------------------------------------|
| <i>Acidaminobacter</i>                    | 0.0004 ± 0.0011     | 0.0000 ± 0.0000           | 0.0000 ± 0.0000         | 0.0089                                                  | 0.1350                                       | 1.0026                              |                                                          |
| <i>Actinobacillus</i>                     | 0.1247 ± 0.3334     | 0.0065 ± 0.0142           | 0.0273 ± 0.1182         | 0.0387                                                  | 0.0135                                       | 1.96348                             | >2.5                                                     |
| <i>Allisonella</i>                        | 0.0409 ± 0.0443     | 0.0612 ± 0.0671           | 0.0930 ± 0.0688         | 0.0761                                                  | 0.0332                                       | -1.43513                            |                                                          |
| <i>Anaerococcus</i>                       | 0.0007 ± 0.0014     | 0.0001 ± 0.0004           | 0.0004 ± 0.0010         | 0.0370                                                  | 0.0370                                       | 1.00259                             | 3                                                        |
| <i>Anaeroglobus</i>                       | 0.0030 ± 0.0085     | 0.0008 ± 0.0026           | 0.0055 ± 0.0132         | 0.0616                                                  | 0.0021                                       | -1.01751                            | >2                                                       |
| <i>Anaeroplasma</i>                       | 0.0727 ± 0.2046     | 0.0013 ± 0.0069           | 0.0000 ± 0.0000         | 0.0097                                                  | 0.1300                                       | 1.65575                             |                                                          |
| <i>Arthrobacter</i>                       | 0.0004 ± 0.0011     | 0.0001 ± 0.0004           | 0.0000 ± 0.0000         | 0.1395                                                  | 0.0435                                       | 1.0026                              |                                                          |
| <i>Bacillus</i>                           | 0.0000 ± 0.0000     | 0.0000 ± 0.0000           | 0.0006 ± 0.0020         | 0.0624                                                  | 0.0291                                       | -1.00434                            |                                                          |
| <i>Betaproteobacteria_Unclassified</i>    | 0.0004 ± 0.0011     | 0.0060 ± 0.0307           | 0.0000 ± 0.0000         | 0.5619                                                  | 0.0071                                       | 1.0026                              | >3                                                       |
| <i>Blautia</i>                            | 0.5490 ± 0.7562     | 0.6304 ± 0.4992           | 0.3261 ± 0.3274         | 0.0479                                                  | 0.0082                                       | 4.6881                              |                                                          |
| <i>Cetobacterium</i>                      | 0.0180 ± 0.0420     | 0.0013 ± 0.0056           | 0.0016 ± 0.0057         | 0.0071                                                  | 0.4970                                       | 1.12006                             |                                                          |
| <i>Citrobacter</i>                        | 0.0041 ± 0.0071     | 0.0002 ± 0.0010           | 0.0012 ± 0.0034         | 0.0025                                                  | 0.3760                                       | 1.0201                              | >2.5                                                     |
| <i>Clostridiaceae_1_Unclassified</i>      | 0.0251 ± 0.0289     | 0.0146 ± 0.0359           | 0.0073 ± 0.0155         | 0.3371                                                  | 0.0417                                       | 1.13162                             |                                                          |
| <i>Clostridium_sensu_stricto</i>          | 0.5722 ± 0.7017     | 0.3599 ± 0.7218           | 0.2080 ± 0.4417         | 0.3628                                                  | 0.0097                                       | 12.4845                             | >3                                                       |
| <i>Clostridium_XI</i>                     | 0.4700 ± 0.7036     | 0.2458 ± 0.3686           | 0.0287 ± 0.0474         | 0.0064                                                  | 0.0001                                       | 21.2974                             | >3                                                       |
| <i>Clostridium_XIX</i>                    | 0.0090 ± 0.0220     | 0.0048 ± 0.0119           | 0.1041 ± 0.4596         | 0.2736                                                  | 0.0106                                       | -1.93294                            |                                                          |
| <i>Clostridium_XVIII</i>                  | 0.1408 ± 0.1772     | 0.0966 ± 0.1916           | 0.0337 ± 0.0577         | 0.1747                                                  | 0.0035                                       | 2.10117                             | >2.5                                                     |
| <i>Coprobacillus</i>                      | 0.0296 ± 0.0587     | 0.0233 ± 0.0444           | 0.0050 ± 0.0114         | 0.1328                                                  | 0.0186                                       | 1.1858                              |                                                          |
| <i>Coprococcus</i>                        | 0.3028 ± 0.5230     | 0.3395 ± 0.4550           | 0.3192 ± 0.7738         | 0.9802                                                  | 0.0478                                       | -1.12029                            |                                                          |
| <i>Corynebacterium</i>                    | 0.0000 ± 0.0000     | 0.0007 ± 0.0017           | 0.0028 ± 0.0061         | 0.0499                                                  | 0.0094                                       | -1.01925                            | >2.5                                                     |
| <i>Enterobacter</i>                       | 0.4055 ± 0.8506     | 0.0648 ± 0.1331           | 0.0574 ± 0.0946         | 0.0063                                                  | 0.2290                                       | 11.1616                             |                                                          |
| <i>Enterobacteriaceae_Unclassified</i>    | 0.6881 ± 1.6563     | 0.0471 ± 0.0941           | 0.1356 ± 0.3618         | 0.0102                                                  | 0.4720                                       | 46.0591                             |                                                          |
| <i>Erysipelotrichaceae_incertae_sedis</i> | 0.5029 ± 0.7094     | 0.3325 ± 0.5341           | 0.1775 ± 0.3285         | 0.2371                                                  | 0.0284                                       | 9.54208                             |                                                          |
| <i>Erysipelotrichaceae_Unclassified</i>   | 0.2300 ± 0.4292     | 0.1440 ± 0.2791           | 0.0338 ± 0.0711         | 0.1071                                                  | 0.0027                                       | 3.8956                              |                                                          |
| <i>Escherichia/Shigella</i>               | 0.4268 ± 0.6794     | 0.1007 ± 0.1894           | 0.1775 ± 0.2932         | 0.0184                                                  | 0.6310                                       | 5.63191                             |                                                          |
| <i>Faecalibacterium</i>                   | 6.4128 ± 4.8694     | 7.5115 ± 6.7945           | 4.1582 ± 3.9255         | 0.0821                                                  | 0.0214                                       | 6.12E+06                            | >4                                                       |
| <i>Fusobacteriales_Unclassified</i>       | 0.0022 ± 0.0042     | 0.0005 ± 0.0014           | 0.0000 ± 0.0000         | 0.0061                                                  | 0.0121                                       | 1.0157                              |                                                          |
| <i>Fusobacterium</i>                      | 0.0116 ± 0.0304     | 0.0021 ± 0.0043           | 0.0029 ± 0.0053         | 0.0531                                                  | 0.9370                                       | 1.06242                             |                                                          |
| <i>Gemmiger</i>                           | 0.0146 ± 0.0187     | 0.0080 ± 0.0159           | 0.0066 ± 0.0134         | 0.4467                                                  | 0.0286                                       | 1.05701                             |                                                          |
| <i>Haemophilus</i>                        | 0.7502 ± 1.1655     | 0.1285 ± 0.1530           | 0.1336 ± 0.2278         | 0.0003                                                  | 0.0345                                       | 71.7567                             |                                                          |
| <i>Klebsiella</i>                         | 0.6440 ± 1.8117     | 0.0333 ± 0.2151           | 0.0002 ± 0.0012         | 0.0164                                                  | 0.0320                                       | 86.6513                             | >3                                                       |
| <i>Kocuria</i>                            | 0.0011 ± 0.0022     | 0.0001 ± 0.0006           | 0.0000 ± 0.0000         | 0.0036                                                  | 0.2160                                       | 1.00782                             |                                                          |
| <i>Lachnobacterium</i>                    | 0.0026 ± 0.0054     | 0.0021 ± 0.0052           | 0.0015 ± 0.0052         | 0.8310                                                  | 0.0275                                       | 1.00777                             |                                                          |
| <i>Lachnospiraceae_Unclassified</i>       | 1.2701 ± 1.0673     | 1.4919 ± 1.2200           | 1.2138 ± 1.8659         | 0.7167                                                  | 0.0238                                       | 1.47682                             |                                                          |
| <i>Lactobacillaceae_Unclassified</i>      | 0.0000 ± 0.0000     | 0.0048 ± 0.0123           | 0.0088 ± 0.0142         | 0.1864                                                  | 0.0098                                       | -1.06254                            | >2                                                       |
| <i>Lactobacillales_Unclassified</i>       | 0.0045 ± 0.0068     | 0.0266 ± 0.0602           | 0.0380 ± 0.0575         | 0.3469                                                  | 0.0350                                       | -1.26105                            |                                                          |
| <i>Lactococcus</i>                        | 0.0105 ± 0.0197     | 0.0106 ± 0.0511           | 0.0003 ± 0.0008         | 0.5780                                                  | 0.0130                                       | 1.07353                             |                                                          |
| <i>Leuconostoc</i>                        | 0.0682 ± 0.1880     | 0.0022 ± 0.0091           | 0.0000 ± 0.0000         | 0.0092                                                  | 0.0066                                       | 1.60402                             | >2.5                                                     |
| <i>Megasphaera</i>                        | 2.7955 ± 7.2795     | 3.1740 ± 6.0261           | 12.0244 ± 12.7508       | 0.0003                                                  | 0.0077                                       | -6.05E+27                           | >4.5                                                     |
| <i>Mitsuokella</i>                        | 0.0832 ± 0.1830     | 0.4976 ± 0.9385           | 1.3349 ± 1.6813         | 0.0067                                                  | 0.0053                                       | -5859.95                            | >3.5                                                     |
| <i>Moraxella</i>                          | 0.0007 ± 0.0014     | 0.0000 ± 0.0000           | 0.0008 ± 0.0022         | 0.0390                                                  | 0.3640                                       | -1.00002                            | >3                                                       |
| <i>Neisseria</i>                          | 0.0067 ± 0.0108     | 0.0024 ± 0.0046           | 0.0115 ± 0.0237         | 0.0325                                                  | 0.1430                                       | -1.0335                             |                                                          |
| <i>Olsenella</i>                          | 0.2292 ± 0.5724     | 0.1233 ± 0.2824           | 0.4793 ± 0.6936         | 0.0125                                                  | 0.0139                                       | -5.66382                            | >3                                                       |
| <i>Oribacterium</i>                       | 0.0041 ± 0.0032     | 0.0033 ± 0.0061           | 0.0039 ± 0.0153         | 0.9566                                                  | 0.0086                                       | 1.0016                              | >2                                                       |
| <i>Pasteurella</i>                        | 0.0116 ± 0.0192     | 0.0025 ± 0.0050           | 0.0054 ± 0.0105         | 0.0274                                                  | 0.2640                                       | 1.0442                              |                                                          |
| <i>Pasteurellaceae_Unclassified</i>       | 0.0461 ± 0.0837     | 0.0071 ± 0.0115           | 0.0145 ± 0.0312         | 0.0072                                                  | 0.8590                                       | 1.2446                              |                                                          |
| <i>Phocoenobacter</i>                     | 0.0022 ± 0.0052     | 0.0002 ± 0.0007           | 0.0004 ± 0.0014         | 0.0153                                                  | 0.1330                                       | 1.01305                             |                                                          |
| <i>Pragia</i>                             | 0.0007 ± 0.0021     | 0.0001 ± 0.0004           | 0.0000 ± 0.0000         | 0.0331                                                  | 0.2580                                       | 1.00521                             |                                                          |
| <i>Raoultella</i>                         | 0.0288 ± 0.0815     | 0.0002 ± 0.0013           | 0.0000 ± 0.0000         | 0.0093                                                  | 0.3400                                       | 1.22119                             |                                                          |
| <i>Roseburia</i>                          | 0.7379 ± 0.6209     | 1.2583 ± 1.7382           | 0.5931 ± 0.9121         | 0.1689                                                  | 0.0213                                       | 2.72723                             |                                                          |

(continued)

SUPPLEMENTAL TABLE 1  
Continued

| Genera                               | No EED <sup>1</sup> | Moderate EED <sup>1</sup> | Severe EED <sup>1</sup> | ANOVA test3 categories moderate and severe EED | Spearman's correlation coefficient (P value) | Fold-Change (no EED vs. severe EED) | LefSe linear discriminate analyses LDA Score(log 10) >2 |
|--------------------------------------|---------------------|---------------------------|-------------------------|------------------------------------------------|----------------------------------------------|-------------------------------------|---------------------------------------------------------|
| <i>Salmonella</i>                    | 0.0367 ± 0.0524     | 0.0058 ± 0.0130           | 0.0419 ± 0.1064         | 0.0455                                         | 0.3600                                       | -1.03698                            |                                                         |
| <i>Schwartzia</i>                    | 0.0004 ± 0.0011     | 0.0000 ± 0.0000           | 0.0000 ± 0.0000         | 0.0089                                         | 0.1040                                       | 1.0026                              |                                                         |
| <i>Streptococcus</i>                 | 2.4028 ± 2.8099     | 2.0381 ± 4.5856           | 2.1341 ± 6.5959         | 0.9823                                         | 0.0360                                       | 6.43869                             |                                                         |
| <i>Subdoligranulum</i>               | 0.2673 ± 0.2737     | 0.2359 ± 0.2880           | 0.0813 ± 0.1184         | 0.0348                                         | 0.0013                                       | 3.63018                             | 3                                                       |
| <i>Succinivibrio</i>                 | 5.3763 ± 5.4325     | 2.2617 ± 4.2070           | 0.7123 ± 2.0520         | 0.0140                                         | 0.0034                                       | 1.10E+14                            | >4                                                      |
| <i>Sutterella</i>                    | 0.0513 ± 0.1013     | 0.1540 ± 0.2653           | 0.4689 ± 0.5102         | 0.0008                                         | 0.0002                                       | -18.0796                            | >3                                                      |
| <i>Syntrophococcus</i>               | 0.0671 ± 0.0551     | 0.0650 ± 0.1163           | 0.0277 ± 0.0796         | 0.3241                                         | 0.0004                                       | 1.3138                              | >2                                                      |
| <i>Turicibacter</i>                  | 0.0198 ± 0.0381     | 0.0147 ± 0.0330           | 0.0005 ± 0.0014         | 0.0908                                         | 0.0036                                       | 1.1435                              | >2                                                      |
| <i>Veillonellaceae_ Unclassified</i> | 0.0251 ± 0.0398     | 0.0237 ± 0.0298           | 0.0547 ± 0.0512         | 0.0060                                         | 0.0043                                       | -1.22749                            | >2                                                      |
| <i>Yokenella</i>                     | 0.0015 ± 0.0032     | 0.0001 ± 0.0006           | 0.0001 ± 0.0006         | 0.0061                                         | 0.2080                                       | 1.00956                             |                                                         |

<sup>1</sup>Genera abundance (% of total bacterial) data are expressed as: means ± standard deviations (SD).
